# Single-Cell Statistical Thermodynamics in Early Embryo Development

Alessandro Giuliani<sup>1</sup>, Masa Tsuchiya\*<sup>2</sup> and Kenichi Yoshikawa<sup>3</sup>

<sup>1</sup>Environment and Health Department, Istituto Superiore di Sanità, Rome, Italy

<sup>2</sup>Systems Biology Program, School of Media and Governance, Keio University, Fujisawa, Japan

<sup>3</sup>Faculty of Life and Medical Sciences, Doshisha University, Kyotanabe, Japan

\*Corresponding author: [tsuchiya.masa@gmail.com](mailto:tsuchiya.masa@gmail.com)

## Abstract

A statistical thermodynamics approach to biological regulation provides a phenomenological description of the dynamics of genome expression in terms of autonomous self-organization with a critical transition (Self-Organized Criticality). In early mouse embryo development, the dynamical change in the self-organization of overall expression determines *how and when* reprogramming of the genome-expression state occurs. Reprogramming occurs via a transition state (climbing over an epigenetic landscape), where the critical-regulation pattern of the zygote state disappears. A critical transition is well captured in terms of the bimodality of expression ensembles, which reflects distinct thermodynamic states (critical states). These critical states exhibit a genome avalanche pattern: competition between order (scaling) and disorder (divergence) around a critical point. The genome avalanche in mouse embryo development, which is committed to erase a previous ordered state, reveals that the direction of early embryo single-cell development traverses the same steps as in differentiation, but in the opposite order.

## Introduction

A fundamental issue in bioscience is to understand the mechanism that underlies the dynamic control of genome-wide expression through the complex temporal-spatial self-organization of the genome to regulate changes in the cell fate.

Our recent studies on genome-scale expression dynamics in the cell-fate change demonstrated the possibility of a statistical thermodynamic analysis (Tsuchiya et al., 2014; Tsuchiya et al., 2015; Tsuchiya et al., 2016). The thermodynamics phenomenological character is at the basis of Albert Einstein's famous statement '*A theory is the more impressive the*

*greater the simplicity of its premises is, the more different kinds of things it relates, and the more extended is its area of applicability. Therefore, the deep impression which classical thermodynamics made upon me. It is the only physical theory of universal content which I am convinced that, within the framework of applicability of its basic concepts, it will be never overthrown'* (Einstein and Schilpp, 1949).

An open-thermodynamic approach clearly reveals how and when the change in a genome-expression state occurs as a thermodynamic event in the disappearance of critical phenomena that arise from an initial state. Furthermore, a detailed global perturbation mechanism for the self-organization of overall expression was elucidated for cell differentiation processes. This demonstration of statistical thermodynamics in the genome (MacArthur and Lemischka, 2013) is particularly crucial in biology, where the extreme complexity of the system rules out any current strict mechanistic approach that considers all of the microscopic regulations involved.

The active process that controls global gene expression in the case of cell fate determination, involves a particular kind of self-organization, called Self-Organized Criticality (SOC) (Bak et al., 1988; Turcotte et al., 2002; Halley et al., 2009; Tsuchiya et al., 2015), which drives the state transitions of gene expression via the mutual interaction among three different gene expression states; 'critical', 'near critical' and 'sub-critical'. Bimodality in gene expression levels is a clear signature of the self-organizing critical transition that is organized into distinct critical states (**Figure 1**). Each gene belongs to one of these three states based on the relative variation of its expression value. This allows for a phenomenological (and thus independent of any mechanistic hypothesis) description of the expression dynamics at the global level.

In this report, we investigate whether the same critical states dynamics we observed for cell differentiation processes (Tsuchiya et al., 2015; Tsuchiya et al., 2016), does exist in overall RNA expression of single-cell mouse embryo development. This case is particularly relevant to give a further proof of SOC control as universal character.

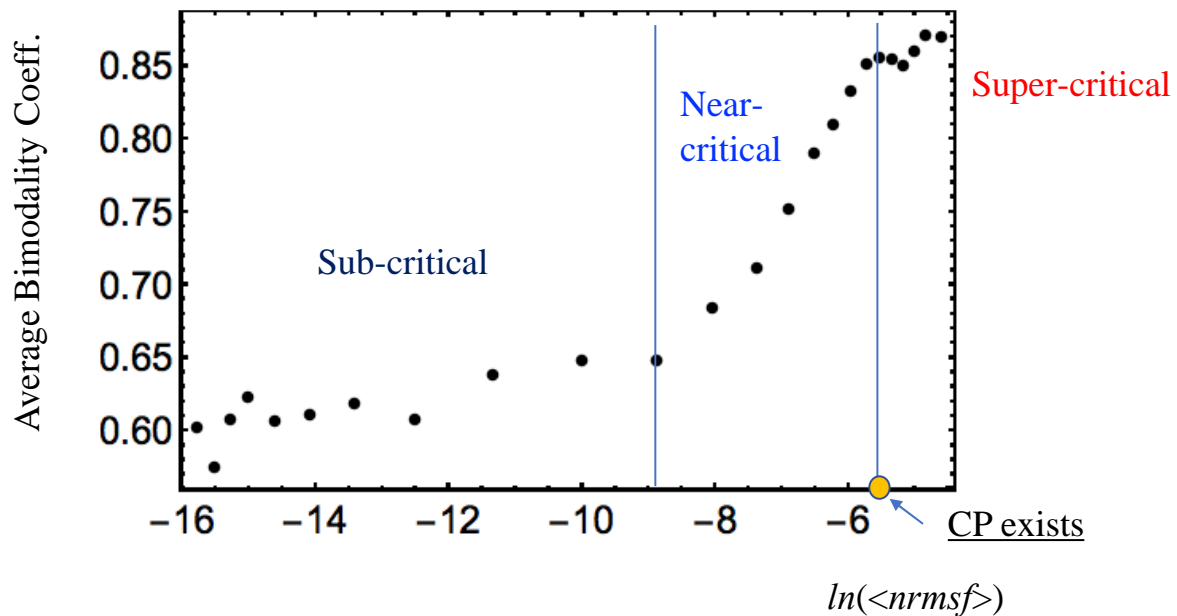

**Figure 1: Critical states emerge through a critical transition in bimodality:**

Bimodality coefficients (average over all cell states) with  $nrmsf$  are estimated. Overall RNA expression is sorted and grouped according to the degree of  $nrmsf$ . This  $nrmsf$  grouping is made at a given sequence of discrete values ( $x_i$ : integer and integer + 0.5 from -15 to -4) of  $nrmsf$  with a fixed range ( $x_i - 0.5 < x_i < x_i + 0.5$ ), and the corresponding average of the bimodality coefficient over the number of cell states is evaluated. The result clearly exhibits a transitional behavior to distinguish (averaged) critical states: with respect to the value of  $\ln\langle nrmsf \rangle$ , sub-critical state  $< -8.8$ ;  $-8.8 < \text{near-critical state} < -5.4$ ;  $-5.4 < \text{super-critical state}$ , where  $\langle \rangle$  indicates the ensemble average of the  $nrmsf$  grouping. A critical point (CP: summit of sandpile criticality: **Figure 3**) exists around the edge ( $\langle nrmsf \rangle \sim 5.5$ ) between the near- and super-critical states.

## Results and Discussion

Early embryo development involves a crucial step in global gene expression control: erasure of the initial maternal-only imprinting' of gene regulation to start a new global control that is driven by the new genetic set-up. In the zygote, the new diploid genome is still inactive in a chromatin fully condensed state, and the metabolism is orchestrated by maternal RNA molecules. Thus, for further development, it is important to erase the previous control to allow for a new start based on the new maternal/paternal mixed genome. In some sense, this 'erasure' path can be considered to be a transformation that proceeds in the direction opposite that for acquisition of a terminal cell fate.

We found that the erasure of purely maternal expression control imprinting in the embryo can be explained by SOC and, much more importantly, the direction of early embryo development traverses the same phases of differentiation, but in the opposite order (**Figure 2**).

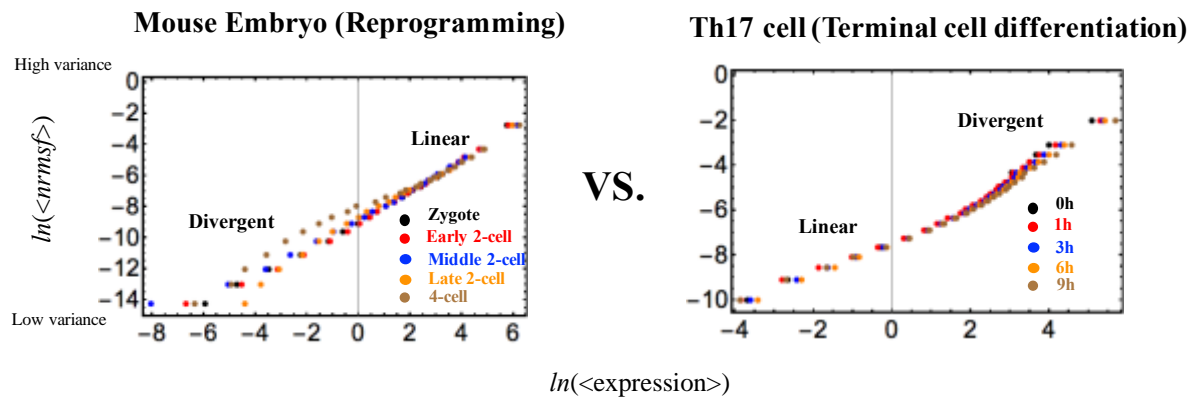

**Figure 2: Genome Avalanches - Scaling Divergent Behaviors:**

In overall expression, scaling-divergent behavior (genome avalanches), an important characteristic of SOC control (see Tsuchiya et al., 2015 and Tsuchiya et al., 2016) is seen in a log-log plot of averaging behaviors: (left panel: mouse embryo development; right panel; Th17 terminal cell differentiation). Log-log plots show the natural logarithm of the group average of expression (x-axis) and *nrmfs* (y-axis) (each dot for mouse:  $n = 685$  RNAs; Th17:  $n = 525$ ), where overall expression is sorted and grouped according to the degree of *nrmfs*. This reveals that order (scaling) and disorder (divergence) are balanced at around the CP (around 5.5 *nrmfs*; **Figure 3**). Two distinct biological processes (reprogramming in early mouse embryo development versus Th17 immune cell differentiation) show opposite scaling-divergent behaviors. Scaling behavior occurs in the ensemble of high-variance RNA expression (high region of *nrmfs*: super-critical state) in mouse early embryo development and divergent behavior occurs in the ensemble of low-variance RNA expression (low region of *nrmfs*: sub-critical state), whereas the Th17 terminal cell fate (single cell) shows opposite behaviors.

The erasure of criticality in global gene expression levels is a clear signature of an approaching critical transition state (**Figure 3**), providing a quantitative (open-) thermodynamic appreciation of the still largely qualitative notion of the epigenetic landscape in the reprogramming process. In mouse embryo development, the critical point (CP: a critical point at the divergence of up- and down-regulation) exists at the boundary of the super-critical state, whereas in differentiation, the CP is at the boundary of the sub-critical state. This points to another kind of 'reversion' with respect to the differentiation phase in addition to the location of the CP state.

The existence of a critical transition state is further supported by the fact that each motion in the phase space of genetic expression can be interpreted (in a completely model-free manner) as a decrease in the correlation with the initial genome-wide-expression profile with increasing time. **Figure 4** reveals such displacement dynamics for embryo early development

in both human and mouse. Note that the two trajectories proceed in parallel, with only a constant delay in time for the human embryo.

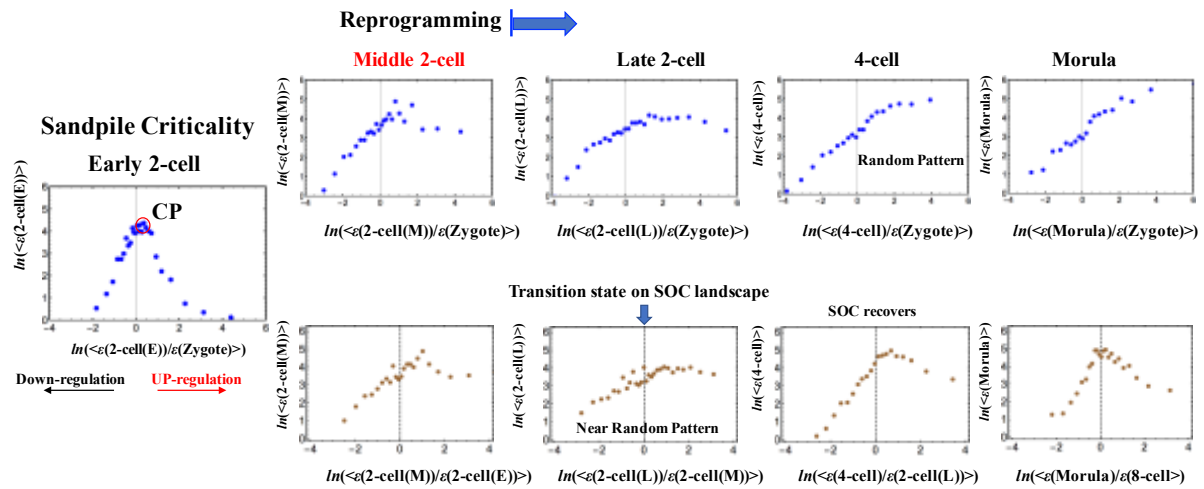

**Figure 3: Timing of the genome-state change on the SOC control landscape in a single cell:**

A change in critical dynamics through sandpile-type criticality (diverging up- and down-regulation at the CP around  $\langle nrmsf \rangle \sim 5.5$ ), which affects the entire genome expression dynamics, appears in the change in overall expression (e.g., fold-change) between different time points (Tsuchiya et al., 2015; Tsuchiya et al., 2016). Thus, the erasure of sandpile-type criticality of the zygote state points to the timing of a genome-state change in mouse embryo development. This erasure of the zygote criticality (upper row) occurs after the middle 2-cell state to reveal a stochastic expression pattern as a linear correlative behavior (refer to Tsuchiya et al., 2016). The transition point occurs at the middle-later 2-cell states (lower row), at which sandpile-type criticality disappears, and thereafter recovers. This shows the existence of a SOC control landscape and a transition state at the middle-later 2-cell states. The  $x$ - and  $y$ -axes represent the fold-change in expression and the group average expression.

From a functional perspective, early embryo development is the 'opposite' of terminal cell-fate differentiation. The erasure of the previously organized state of the zygote implies an increase in stochasticity of gene expression regulation in terms of the distribution of different RNA species. This is consistent with the fact that, in the early stages of development, the embryo must eliminate the maternal-only imprinting' of the zygote to 'start-from-scratch' with a new developmental program driven by the maternal/paternal genome pattern. (Brachet and Alexandre, 2012). In contrast, the path toward a terminal cell fate is a path toward increasing order with respect to the undifferentiated state (Huang et al., 2005).

These findings are purely phenomenological at the present and await the discovery of mechanistic microscopic bases. However, our results suggest that a single-cell statistical thermodynamics approach to biological regulation provides useful insight to unveil the

underlying mechanism on self-regulation of life in the cases where the extreme complexity of the system rules out any strict mechanistic approach.

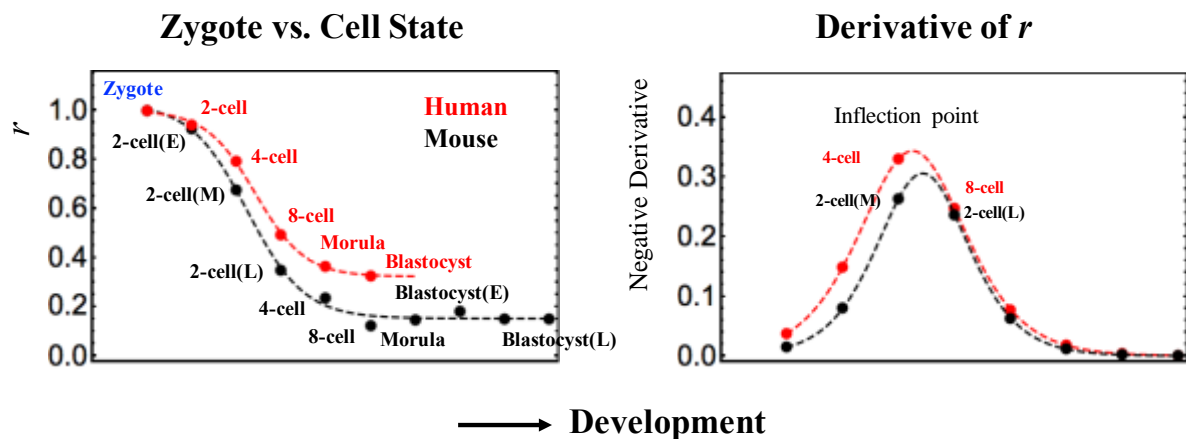

**Figure 4: Critical transition revealed through changes in the Pearson correlation between the zygote and cell developed states:**

The Pearson correlation transition further supports the timing of a genome-state change via a transition state (**Figure 3**): the Pearson correlation for the cell state with the zygote exhibits a critical transition as a tangent hyperbolic function:  $a - b \cdot \tanh(c \cdot x - d)$ ;  $x$  represents the cell state with  $a = 0.59$ ,  $b = 0.44$ ,  $c = 0.78$  and  $d = 2.5$  ( $p < 10^{-3}$ ) for human (red dashed line), and  $a = 0.66$ ,  $b = 0.34$ ,  $c = 0.90$  and  $d = 3.1$  ( $p < 10^{-2}$ ) for mouse (black). This plot clearly shows that a phase transition occurs at the inflection point (zero second derivative of the tangent hyperbolic function), where there is a phase difference between the 4-cell and 8-cell states for human, and between the middle and late 2-cell states for mouse.

## Acknowledgments

MT sincerely thanks the Institute for Advanced Biosciences, Keio University, Tsuruoka City, the Yamagata prefectural government, Japan, and Mr. Fumiaki Kikuchi for allowing him to complete this research project at Keio University. The authors are thankful to Dr. Midori Hashimoto for helping to produce the Figures.

## Methods

### Biological Data Sets:

We analyzed mammalian RNA-Seq data:

- i) Early embryonic development in human and mouse developmental stages in RPKM (Reads Per Kilobase Mapped) values; GEO ID: GSE36552 (human:  $N = 20286$  RNAs) and GEO ID:

GSE45719 (mouse:  $N = 22957$  RNAs), which have 7 and 10 embryonic developmental stages (experimental details in Yan et al., 2013 and Deng et al., 2014, respectively):

Human: oocyte ( $m=3$ ), zygote ( $m=3$ ), 2-cell ( $m=6$ ), 4-cell ( $m=12$ ), 8-cell ( $m=20$ ), morula ( $m=16$ ) and blastocyst ( $m=30$ ),

Mouse: zygote ( $m=4$ ), early 2-cell ( $m=8$ ), middle 2-cell ( $m=12$ ), late 2-cell ( $m=10$ ), 4-cell ( $m=14$ ), 8-cell ( $m=28$ ), morula ( $m=50$ ), early blastocyst ( $m=43$ ), middle blastocyst ( $m=60$ ) and late blastocyst ( $m=30$ ), where  $m$  is the total number of single cells.

ii) T helper 17 cell differentiation from mouse naive CD4<sup>+</sup> T cells in RPKM values, where Th17 cells are cultured with anti-IL4, anti-IFN $\gamma$ , IL-6 and TGF- $\beta$  (details in Ciofani et al., 2012); GEO ID: GSE40918 (mouse:  $N = 22281$  RNAs), which has 9 time points:  $t_0 = 0$ ,  $t_1 = 1, 3, 6, 9, 12, 16, 24$ ,  $t_{T=8} = 48$ h.

RNAs that had RPKM values of 0 over all of the cell states were excluded. Random real numbers in the interval [0-1] generated from a uniform distribution were added to all expression values for the natural logarithm. This procedure avoids the divergence of zero values in the logarithm. The robust sandpile-type criticality through the grouping of expression (**Figure 1B**) was checked by multiplying the random number by a positive constant,  $a$  ( $a < 10$ ), and we set  $a = 0.01$ . Note: The addition of large random noise ( $a \gg 10$ ) destroys the sandpile CP.

### SOC Control Mechanism of the Cell-fate Change

We previously demonstrated that the critical dynamics of self-organizing whole-genome expression (self-organized criticality: SOC) play essential roles in determining the cell-fate change in distinct biological processes at both the single-cell and population (tissue) levels (Tsuchiya et al., 2016).

In SOC-controlled self-organization (in terminal cell differentiation), *nrmsf* (normalized root mean square fluctuation) acts as an order parameter for the self-organization of whole gene expression (Tsuchiya et al., 2015; Tsuchiya et al., 2016). We can examine if *nrmsf* acts as an order parameter in early embryo development, which is determined by dividing *rmsf* by the maximum overall  $\{rmsf_i\}$ :

$$rmsf_i = \sqrt{\frac{1}{S} \sum_{j=1}^S (\varepsilon_i(s_j) - \langle \varepsilon_i \rangle)^2}, \quad (1)$$

where *rmsf<sub>i</sub>* is the *rmsf* value of the *i<sup>th</sup>* RNA expression, which is expressed as  $\varepsilon_i(s_j)$  at a specific cell state  $s_j$  (e.g., in mouse,  $S = 10$ :  $s_1 =$  zygote, early 2-cell, middle 2-cell, late 2-cell, 4-cell, 8-cell, morula, early blastocyst, middle blastocyst and  $s_{10} =$  late blastocyst), and  $\langle \varepsilon_i \rangle$  is its

expression average over the number of cell states. Regarding self-organization with critical dynamics, we investigated averaging behaviors in *nrm5f*, and in the fold-change in expression, where we observed a stochastic resonance effect in the terminal cell fate process. For methodological details, refer to our previous works (Tsuchiya et al., 2015; Tsuchiya et al., 2016).

## References

Bak P, Tang C, Wiesenfeld K (1988) Self-organized criticality. *Physical Review A* 38: 364-374.

doi: 10.1103/PhysRevLett.59.381.

Brachet, J., & Alexandre, H. (2012). *Introduction to molecular embryology*. Springer Science & Business Media.

Ciofani M, Madar A, Galan C, Sellars M, Mace K, Pauli F, *et al.* (2012) A validated regulatory network for Th17 cell specification. *Cell* 151: 289-303.

doi: 10.1016/j.cell.2012.09.016. pmid:23021777

Deng Q, Ramsköld D, Reinius B, Sandberg R (2014) Single-cell RNA-seq reveals dynamic, random monoallelic gene expression in mammalian cells. *Science* 343:193–196.

doi: 10.1126/science.1245316

Einstein A, Schilpp PA (1949) *Autobiographical notes*. Open Court Publishing Company.

Halley JD, Burden FR, Winkler DA (2009) Summary of stem cell decision making and critical-like exploratory networks. *Stem Cell Research* 2: 165-177.

doi: 10.1016/j.scr.2009.03.001

Huang S, Eichler G, Bar-Yam Y, Ingber DE (2005) Cell fates as high-dimensional attractor states of a complex gene regulatory network. *Physical Review Letters*, 94(12), 128701.

doi: 10.1103/PhysRevLett.94.128701

MacArthur BD, Lemischka IR (2013) Statistical mechanics of pluripotency. *Cell* 154: 484–489.

doi: 10.1016/j.cell.2013.07.024



Tsuchiya M, Hashimoto M, Takenaka Y, Motoike IN, Yoshikawa K (2014) Global genetic response in a cancer cell: Self-organized coherent expression dynamics. PLoS One 9: e97411. doi: 10.1371/journal.pone.0097411

Tsuchiya M, Giuliani A, Hashimoto M., Erenpreisa J, Yoshikawa K (2015) Emergent Self-Organized Criticality in gene expression dynamics: Temporal development of global phase transition revealed in a cancer cell line. PLoS One 11: e0128565. doi:10.1371/journal.pone.0128565

Tsuchiya M, Giuliani A, Hashimoto M., Erenpreisa J, Yoshikawa K (2016) Self-organizing global gene expression regulated through criticality: mechanism of the cell-fate change. PLoS One 11: e0167912. doi:10.1371/journal.pone.0167912

Turcotte DL, Rundle JB (2002) Self-organized complexity in the physical, biological, and social sciences. Proceedings of the National Academy of Sciences USA 99 (Suppl 1): 2463-2465. doi: 10.1073/pnas.012579399

Yan L, Yang M, Guo H, Yang L, Wu J, Li R, *et al.* (2013) Single-cell RNA-Seq profiling of human preimplantation embryos and embryonic stem cells. Nature Structural & Molecular Biology 20:1131-1139. doi: 10.1038/nsmb.2660
